# Supplementary material for: Genome-Wide Characterization and Expression of the Hsf Gene Family in Salvia miltiorrhiza (Danshen) and the Potential Thermotolerance of SmHsf1 and SmHsf7 in Yeast
Source: MDPI journal article supplement (doi:10.3390/ijms24108461), 2023-05-09
Supplement: s1 [file s1]

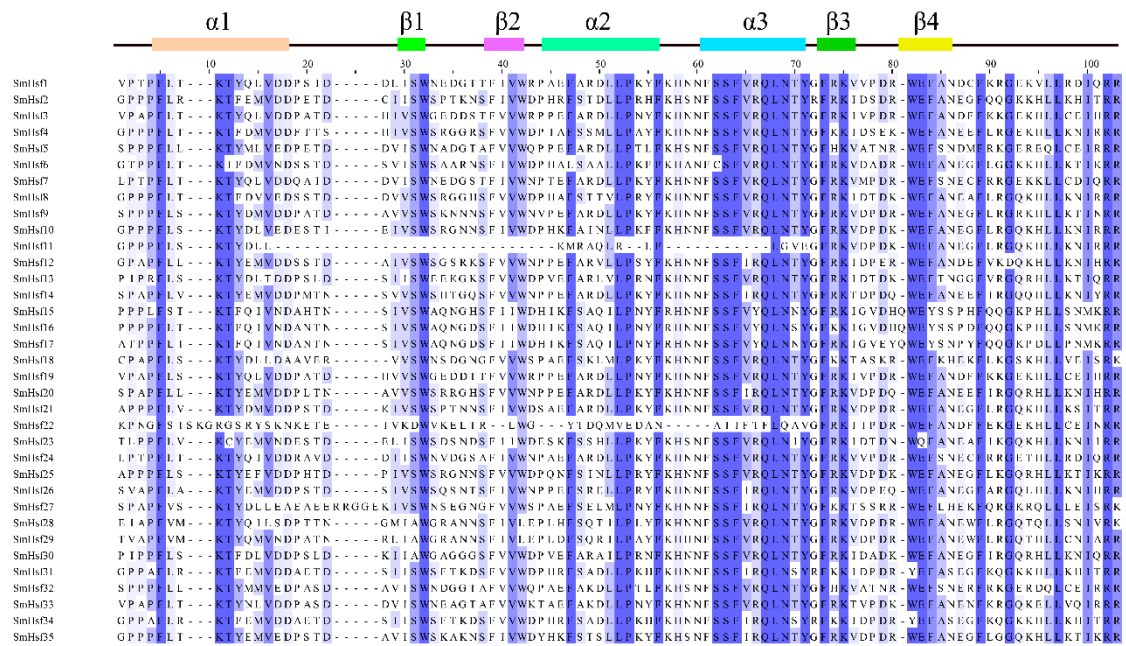

Figure S1 Multiple sequence alignment of DBD domain of SmHsf proteins from *S. miltiorrhiza*. The different colors represent three  $\alpha$ -helices and four  $\beta$ -sheets. Sequences were aligned using MEGA with Muscle by default parameters (version 11). Gradient blue colors represent sequence consensus from low to high.

Table S1 Sequence characteristics of heat shock transcription factors (SmHsfs) in *S. miltiorrhiza*.

| Gene name | Gene ID    | Strand | CDS (bp) | Exons | Protein length<br>(aa) | MW<br>(kDa) | Instability<br>Index | GRAVY | PI   | Localization             |
|-----------|------------|--------|----------|-------|------------------------|-------------|----------------------|-------|------|--------------------------|
| SmHsf1    | EVM0002416 | -      | 873      | 3     | 291                    | 31.36       | 65                   | -0.61 | 5.89 | Nuclear                  |
| SmHsf2    | EVM0014513 | +      | 1095     | 2     | 365                    | 42.05       | 76.59                | -0.70 | 5.84 | Nuclear                  |
| SmHsf3    | EVM0027188 | -      | 1026     | 2     | 342                    | 37.90       | 67.8                 | -0.49 | 8.22 | Nuclear                  |
| SmHsf4    | EVM0020872 | +      | 1074     | 4     | 358                    | 41.64       | 61.23                | -0.91 | 5.72 | Nuclear                  |
| SmHsf5    | EVM0022616 | -      | 702      | 2     | 234                    | 26.51       | 65.32                | -0.80 | 8.74 | Nuclear                  |
| SmHsf6    | EVM0014116 | -      | 951      | 2     | 317                    | 34.59       | 78.99                | -0.48 | 4.88 | Nuclear                  |
| SmHsf7    | EVM0020650 | +      | 1038     | 3     | 346                    | 37.89       | 66.75                | -0.59 | 5.36 | Nuclear                  |
| SmHsf8    | EVM0018201 | -      | 1005     | 4     | 335                    | 38.37       | 65.99                | -0.80 | 5.8  | Nuclear                  |
| SmHsf9    | EVM0013164 | -      | 1527     | 3     | 509                    | 56.36       | 76.38                | -0.55 | 5.26 | Nuclear                  |
| SmHsf10   | EVM0004220 | -      | 987      | 2     | 329                    | 37.62       | 74.27                | -0.68 | 6.29 | Nuclear                  |
| SmHsf11   | EVM0003811 | -      | 780      | 3     | 260                    | 29.74       | 77.53                | -0.72 | 9.19 | Cytoplasmic<br>Nuclear   |
| SmHsf12   | EVM0013673 | +      | 1449     | 2     | 483                    | 53.64       | 66.78                | -0.75 | 5.36 | Nuclear                  |
| SmHsf13   | EVM0001289 | -      | 1059     | 2     | 353                    | 39.75       | 71.7                 | -0.62 | 5.92 | Nuclear                  |
| SmHsf14   | EVM0012238 | +      | 1167     | 2     | 389                    | 43.87       | 68.09                | -0.69 | 5.72 | Nuclear                  |
| SmHsf15   | EVM0000817 | -      | 798      | 2     | 266                    | 30.54       | 71.4                 | -0.68 | 6.72 | Nuclear                  |
| SmHsf16   | EVM0024007 | +      | 759      | 2     | 253                    | 28.70       | 74.33                | -0.58 | 5.9  | Nuclear                  |
| SmHsf17   | EVM0014653 | +      | 783      | 2     | 261                    | 30.16       | 78                   | -0.66 | 5.77 | Nuclear                  |
| SmHsf18   | EVM0012567 | +      | 564      | 2     | 188                    | 21.66       | 64.12                | -0.59 | 9.76 | Mitochondrial<br>Nuclear |
| SmHsf19   | EVM0017861 | -      | 873      | 2     | 291                    | 33.42       | 71.24                | -0.63 | 6.92 | Nuclear                  |

| Gene name | Gene ID    | Strand | CDS (bp) | Exons | Protein length<br>(aa) | MW<br>(kDa) | Instability<br>Index | GRAVY  | PI   | Localization           |
|-----------|------------|--------|----------|-------|------------------------|-------------|----------------------|--------|------|------------------------|
| SmHsf20   | EVM0007953 | +      | 1278     | 2     | 426                    | 48.24       | 68.35                | -0.75  | 5.44 | Nuclear                |
| SmHsf21   | EVM0002514 | +      | 1509     | 2     | 503                    | 55.09       | 62.01                | -0.62  | 4.78 | Nuclear                |
| SmHsf23   | EVM0012123 | -      | 1152     | 2     | 384                    | 43.55       | 71.31                | -0.65  | 4.64 | Nuclear                |
| SmHsf24   | EVM0006191 | -      | 684      | 2     | 228                    | 26.43       | 68.77                | -0.73  | 6.97 | Nuclear                |
| SmHsf25   | EVM0021531 | +      | 942      | 2     | 314                    | 36.13       | 66.68                | -0.79  | 5.11 | Nuclear                |
| SmHsf26   | EVM0028007 | +      | 1200     | 2     | 400                    | 45.23       | 68.67                | -0.73  | 5.16 | Nuclear                |
| SmHsf27   | EVM0004954 | +      | 564      | 2     | 188                    | 22.13       | 65.24                | -0.90  | 9.93 | Nuclear                |
| SmHsf28   | EVM0003128 | -      | 1011     | 2     | 337                    | 37.66       | 66.76                | -0.50  | 4.89 | Nuclear                |
| SmHsf29   | EVM0007734 | -      | 1062     | 2     | 354                    | 39.55       | 64.67                | -0.72  | 5.7  | Nuclear                |
| SmHsf30   | EVM0022005 | -      | 1464     | 2     | 488                    | 54.26       | 66.45                | -0.57  | 5    | Cytoplasmic<br>Nuclear |
| SmHsf31   | EVM0010800 | +      | 1026     | 2     | 342                    | 39.15       | 62.02                | -0.73  | 5.39 | Nuclear                |
| SmHsf32   | EVM0006922 | -      | 675      | 2     | 225                    | 25.71       | 78.75                | -0.63  | 8.32 | Nuclear                |
| SmHsf33   | EVM0013214 | +      | 810      | 2     | 270                    | 29.51       | 60.26                | -0.68  | 6.34 | Nuclear                |
| SmHsf34   | EVM0003304 | -      | 882      | 2     | 294                    | 33.68       | 57.61                | -0.87  | 8.43 | Nuclear                |
| SmHsf35   | EVM0012493 | +      | 1089     | 3     | 363                    | 40.94       | 70.25                | - 0.66 | 4.84 | Nuclear                |

CDS, coding sequece; MW, molecular weight; GRAVY, grand average of hydropathicity; pI, isoelectric point

Table S2 Functional domains analysis of SmHsfs in *S. miltiorrhiza*

| Gene name | DBD    | HR-A/B  | NLS                                   | NES                    | RD         | AHA                   |
|-----------|--------|---------|---------------------------------------|------------------------|------------|-----------------------|
| SmHsf1    | 22-115 | 165-198 | (249) LKRLKRSENGNGGGGERMAKDVKSE       | N.D.                   | (242) LFGV | N.D.                  |
| SmHsf2    | 56-149 | 166-209 | (248) GEVLKKRRRLA                     | (199) SHLAAVEKRLRITE   | N.D.       | N.D.                  |
| SmHsf3    | 21-114 | 175-202 | (305) KKRLHPECNSTAATTNKTRLVLEKDDL     | N.D.                   | (297) LFGV | N.D.                  |
| SmHsf4    | 40-133 | 172-206 | (312) EDLLKQGFDEGEKLVKDEDAEVYHKNQRF   | (271) QMSELEALALQMQ    | N.D.       | N.D.                  |
| SmHsf5    | 18-111 | 140-182 | (210) EKEKKRKRAHE                     | N.D.                   | (200) LFGV | N.D.                  |
| SmHsf6    | 28-121 | 155-188 | (116) KTIKRRRNTS                      | (274) DPITDDVLEMLLSEED | N.D.       | N.D.                  |
| SmHsf7    | 23-116 | 171-205 | (6) VDRSGSGESTAGDAPRSLPTPFLTKTYQL     | N.D.                   | (281) LFGV | N.D.                  |
| SmHsf8    | 34-127 | 167-202 | (220) HKEKRKELEEAIKKRRRPI             | (161) KLVLVTELVKLRQQQ  | N.D.       | N.D.                  |
| SmHsf9    | 14-107 | 134-171 | (212) RHISGANKKRRLPNQDEESLARKLSITS    | (167) SQLQTVGQRVHVMEQ  | N.D.       | (444)NDVFWEQFLPESPLI  |
| SmHsf10   | 38-131 | 153-248 | (235) IGKKRRKKID                      | N.D.                   | N.D.       | N.D.                  |
| SmHsf11   | 38-94  | 107-202 | (189) IGKKRRKKID                      | (226) EAQDFDDLKVGWD    | N.D.       | N.D.                  |
| SmHsf12   | 16-109 | 125-180 | (207) YNKKRRRLPQ                      | N.D.                   | N.D.       | (429)DVFWEQFLTERPGC   |
| SmHsf13   | 46-139 | 145-181 | (23) ESLPLRPPPSVASFDSRPLASPPIPRFLSKTY | N.D.                   | N.D.       | N.D.                  |
| SmHsf14   | 10-103 | 120-148 | (193) EFQRKKRRSVALNF                  | N.D.                   | N.D.       | (362) NDVFWQQFLTEAP   |
| SmHsf15   | 24-118 | 136-183 | (114) NMKRRSLQMSPTPPRQKNSLSP          | (245) QHAIAIAQDFQVWLTE | N.D.       | N.D.                  |
| SmHsf16   | 22-116 | 125-162 | (111) SNMKRRALQM                      | N.D.                   | N.D.       | N.D.                  |
| SmHsf17   | 13-107 | 125-172 | (102) PNMKRRSEQNNPTPPRQKNSLSP         | (242) QHAIAIAQDFQVWLIE | N.D.       | N.D.                  |
| SmHsf18   | 16-108 | 130-159 | (6)RVGSKPHKMKCPAPFLSKTYDLLDAVERVVS    | (152) QISHFKAVEMRLLE   | N.D.       | N.D.                  |
| SmHsf19   | 21-114 | 159-189 | (258) KKRLHSEFNSSNKSRLVLEKDDLGLNLMP   | N.D.                   | (249) LFGV | N.D.                  |
| SmHsf20   | 10-103 | 114-171 | (193) FPNKKRRLLALQY                   | N.D.                   | N.D.       | (358)DMFWQQFLTEAPAS   |
| SmHsf21   | 29-122 | 150-181 | (232) EGNKKRRRLKQD                    | (265) EAAKAMLRLQIMKLD  | N.D.       | (440)SDPFWEKFLQSPPPV  |
| SmHsf22   | 2-88   | 146-185 | N.D.                                  | N.D.                   | N.D.       | N.D.                  |
| SmHsf23   | 10-103 | 130-183 | N.D.                                  | (177) QQMLSFIVMAMQSPE  | N.D.       | (304) NDAVLEQLLLPYPST |
| SmHsf24   | 22-115 | 129-160 | (172)RARACKLYMTENVKPLELLPMTRFCQEMTR   | (210) SAEHHMDLELRPLGD  | N.D.       | N.D.                  |

| Gene name | DBD    | HR-A/B  | NLS                                 | NES                    | RD         | AHA                  |
|-----------|--------|---------|-------------------------------------|------------------------|------------|----------------------|
| SmHsf25   | 19-112 | 145-195 | (105) LLKTIKRRRKQT                  | N.D.                   | N.D.       | N.D.                 |
| SmHsf26   | 11-104 | 121-177 | (198) HDRKRRFPG                     | (243) ELLDQIDSSMSLWE   | N.D.       | (335)NDVFWEQFLTENPGS |
| SmHsf27   | 18-116 | 135-170 | (13) RRKMKSAPFVSKTYDLLEAEAEERRGGEK  | (162) QIAHFKALQLSLLQ   | N.D.       | N.D.                 |
| SmHsf28   | 21-114 | 137-173 | N.D.                                | N.D.                   | N.D.       | N.D.                 |
| SmHsf29   | 15-108 | 118-164 | (190) RLTPDKKRKLM                   | N.D.                   | N.D.       | N.D.                 |
| SmHsf30   | 93-186 | 212-259 | N.D.                                | N.D.                   | N.D.       | N.D.                 |
| SmHsf31   | 63-156 | 180-229 | (256) GMSKKRRRVACE                  | (207) DMAAVRERLRVTE    | (231) LFGV | N.D.                 |
| SmHsf32   | 17-110 | 134-180 | (150) ENKRLKRENDALNSELLLLKRKCQQL    | (200) QALKLFGVRLEVGSE  | (204) LFGV | N.D.                 |
| SmHsf33   | 6-99   | 149-186 | (238) KKRGCCSGGGADLCGPHKKQMKPW      | (184)DELIAFLTQCVKVAPDE | N.D.       | N.D.                 |
| SmHsf34   | 61-154 | 175-220 | (26) RVKEEEESFMFSAAAAEGDQNQPPKAMPME | (201) SSMAAVRERLRVTE   | N.D.       | N.D.                 |
| SmHsf35   | 39-132 | 155-205 | (125) LLKTIKRRRRNVM                 | N.D.                   | N.D.       | N.D.                 |

DBD, DNA binding domain; HR-A/B, Oligomerization domain; NLS, Nuclear localization signal; NES, Nuclear export signal; AHA, Transcriptional activation domain; RD, Repressor domain; N.D., not detected. For the NLS, NES, RD and AHA column, the numbers in parenthesis are the start site of the functional domain.

Table S3 The detailed information of conserved motifs in SmHsfs by MEME tools

| Motif | E-value   | Width | Best Possible Match                               |
|-------|-----------|-------|---------------------------------------------------|
| 1     | 5.7e-1034 | 41    | FVVWDPPEFSRDLLPKYFKHNNFSSFVRQLNTYGFRKVDPD         |
| 2     | 4.2e-513  | 29    | RWEFANEGFLRGQKHLLKNIRRRKTSSSS                     |
| 3     | 7.9e-473  | 29    | PPPFLTKTYEMVDDPSTDSIISWSRDGNS                     |
| 4     | 5.7e-255  | 41    | CVESGRFGLEEENERLRREKNVLMaelVKLRQQQQSTRAQL         |
| 5     | 9.6e-152  | 29    | ZRLQGTEQKQQQMMSFLAKALQNPDFLQQ                     |
| 6     | 3.1e-022  | 11    | PQPM EGLHEAG                                      |
| 7     | 1.0e-019  | 15    | NDVFWEQFLTEAPGS                                   |
| 8     | 1.3e-014  | 23    | JVQHKEKKKEIEEAIGKKRRKKI                           |
| 9     | 3.0e-016  | 50    | VPHHHHPITGGFFPYPSRLSISPTDSDDHPWGESPPPLASPTGGGYHSV |
| 10    | 1.1e-009  | 41    | DHQELVFQDREGGDDHGNYISFGGGVKVEAQDFDDLKVG EW        |
